# Supplementary material for: XAANTAL1 Reveals an Additional Level of Flowering Regulation in the Shoot Apical Meristem in Response to Light and Increased Temperature in Arabidopsis
Source: MDPI journal article supplement (doi:10.3390/ijms241612773), 2023-08-14
Supplement: s1 [file s1]

**A**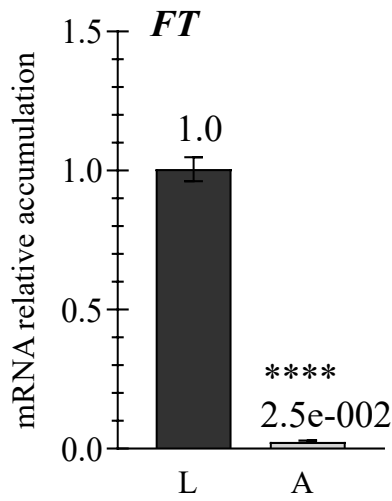**B**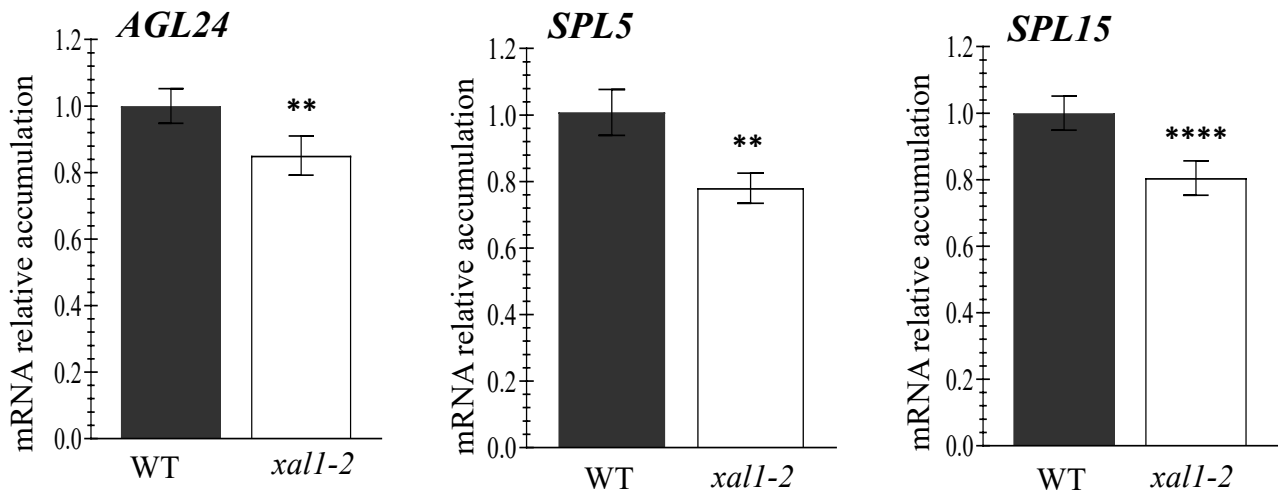

**Figure S1.** Expression analysis of additional flowering genes. **(A)** *FT* is highly accumulated in leaves (L) compared to apices (A) collected from WT control plants. **(B)** XAL1 positively regulates *AGL24*, *SPL5*, and *SPL15*. RT-qPCRs were performed with RNA extracted from shoot apices of WT and *xal1* plants. *PDF2* and *RNAH* were used as qPCR internal controls. Data represent the mean value  $\pm$  standard error of three biological replicates. Statistical analysis was performed by a T-Student Test (\*\*  $p < 0.01$ ; \*\*\*\*  $p < 0.0001$ ). 14-day-old plants were used in all cases.

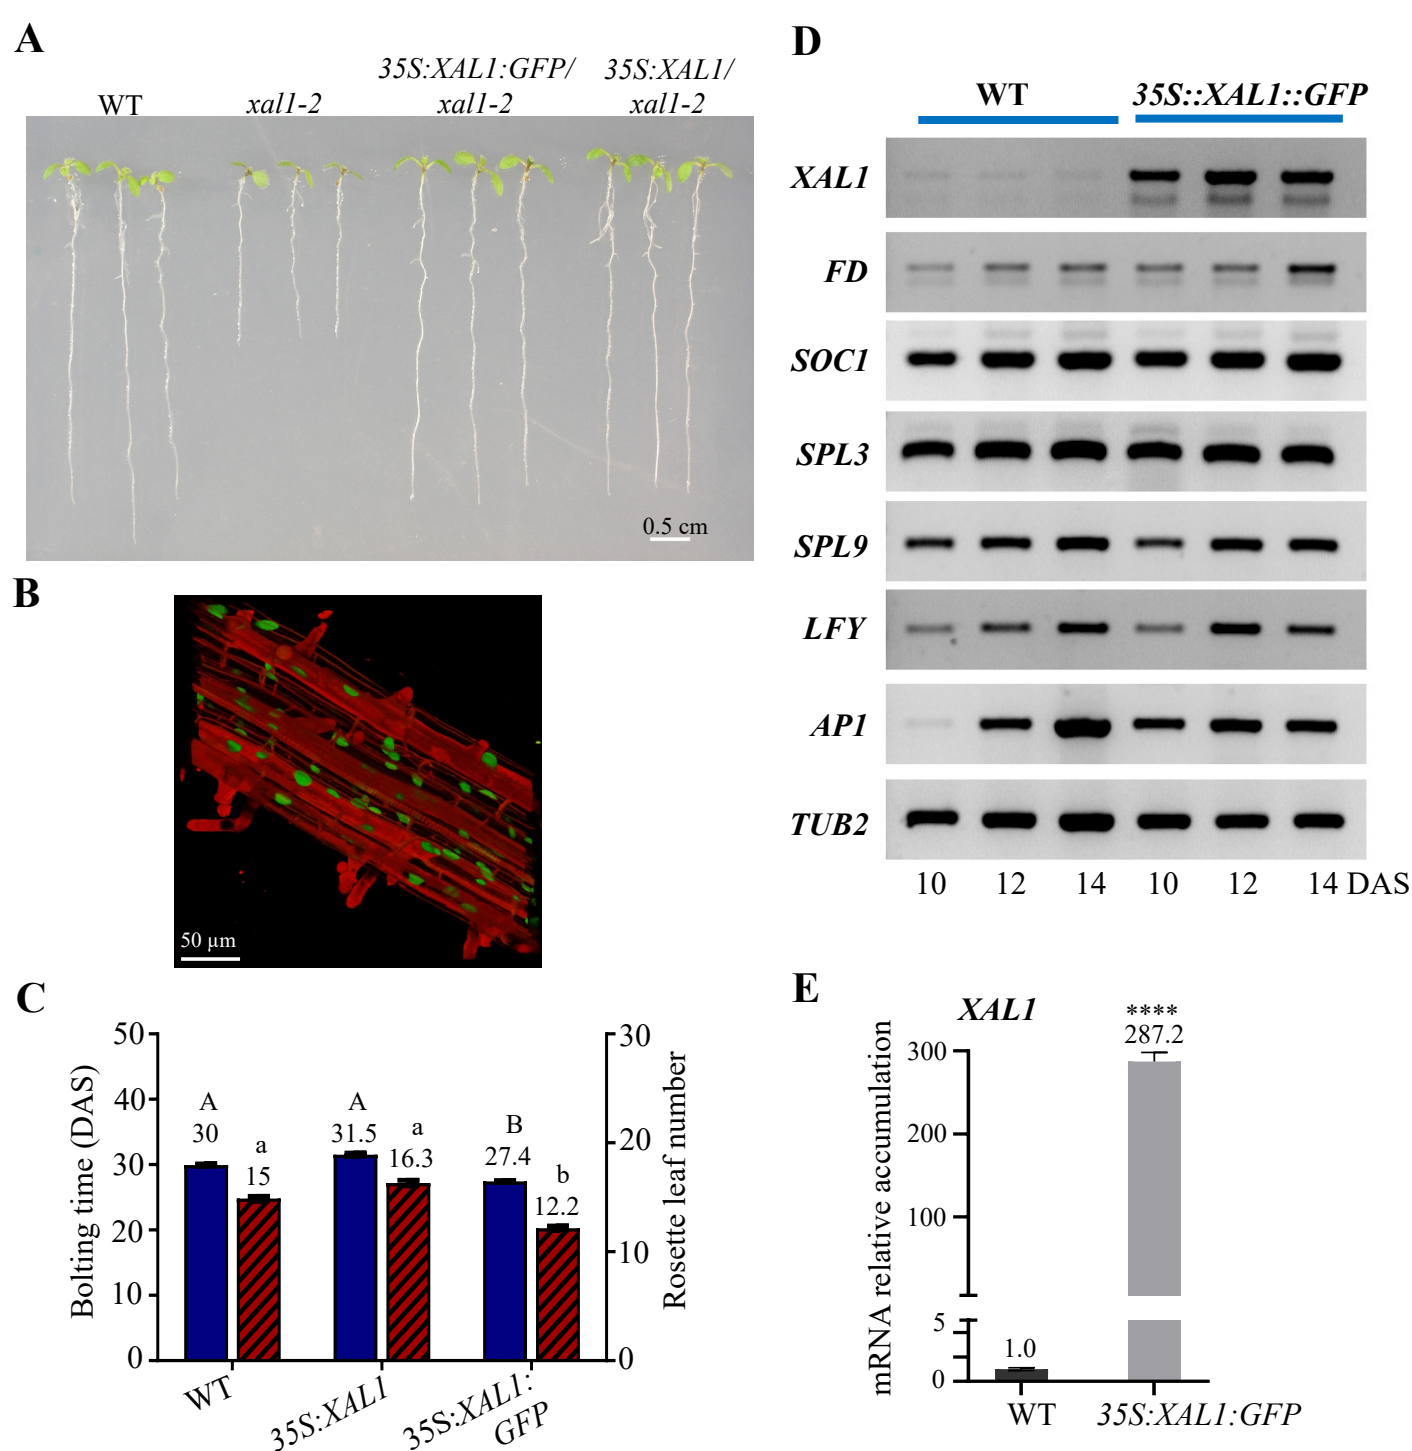

**Figure S2.** Expression analysis and effect of the *XAL1* overexpression lines. (A) Complementation of the *xall-2* root phenotype with 35S::*XAL1*::GFP and 35S::*XAL1*, respectively. (B) *XAL1* expression in the nuclei of 35S::*XAL1*::GFP/*xall-2* roots observed by confocal microscopy. Z-stack image of 165 optical sections, step-size of 0.8  $\mu$ m. (C) Flowering time of both overexpression lines in the *xall-2* background compared to WT, under LD photoperiod. Statistical analysis was performed by a Kruskal-Wallis test followed by a Dunn's analysis  $P < 0.001$  ( $n = 39-46$ ). (D) Expression analysis of some flowering time genes in the complete aerial section of the 35S::*XAL1*::GFP/*xall-2* seedlings compared to the WT. Plants were grown on MS plates for 10, 12, and 14 days after sowing (DAS). *TUB2* was used as an internal RT-PCR control. (E) Relative *XAL1* accumulation levels in the aerial section of the 35S::*XAL1*::GFP/*xall-2* line compared to WT seedlings of 14 DAS. *RNAH* and *UPL7* genes were used as internal controls. Statistical difference was obtained by a T-student test \*\*\*\* $P < 0.0001$  ( $n = 3$  biological replicates).

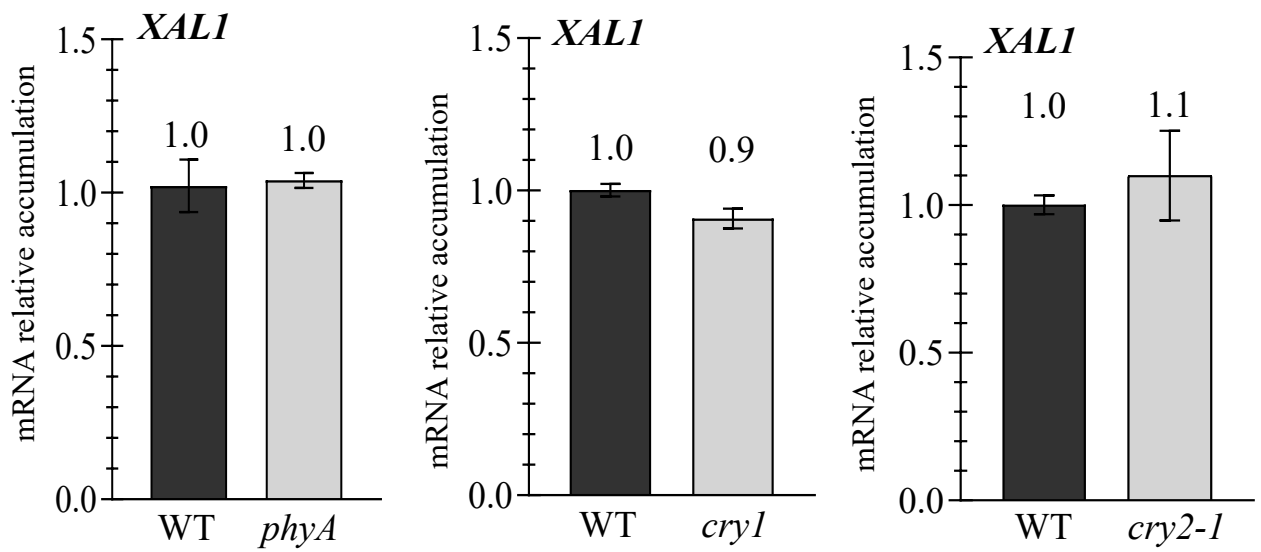

**Figure S3.** PHYA, CRY1 and CRY2 do not regulate *XAL1* in apices from 18 DAS plants grown under LD photoperiod. RT-qPCR were performed using three replicates in each case. *PDF2* and *UPL7* were used as internal constitutive controls. Data represent the mean value  $\pm$  standard error. Statistical analysis performed with a T-student test.

**A**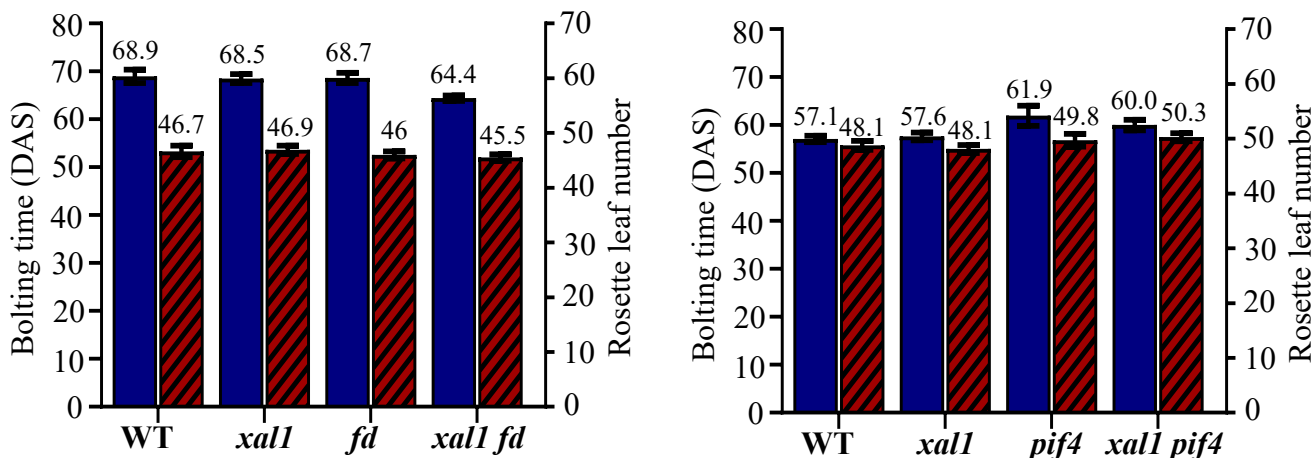**B**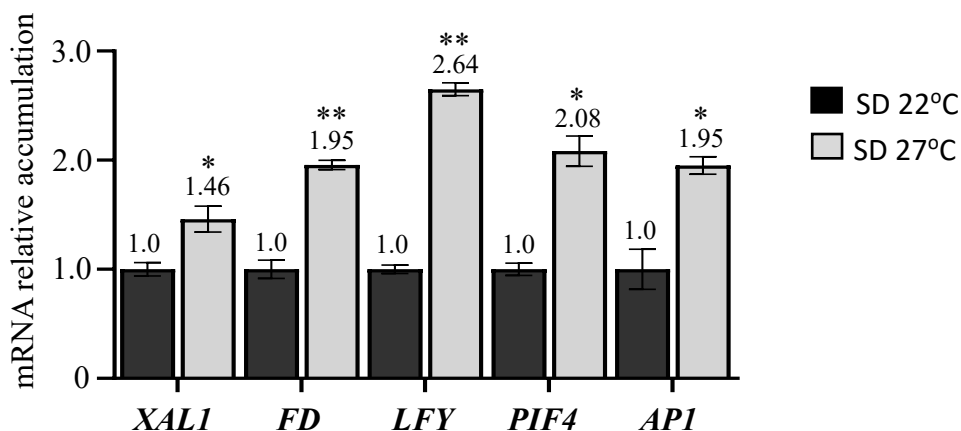

**Figure S4.** Control experiments of flowering time under SD at 22 °C and induction of key flowering genes at 27 °C. **(A)** Single and double mutants show no significant difference between them and the WT when grown under SD photoperiod at 22 °C. Blue bars correspond to the bolting time, and stripped red columns show the rosette leaf number (left graphic  $n = 30-35$ , right graphic  $n = 16-34$ ). **(B)** RT-qPCR of some flowering genes in WT shoot apices from plants grown under SD at 22 or 27 °C, respectively. Statistical differences were obtained by a T-student test \* $P < 0.05$ ; \*\* $P < 0.01$ . *RNAH* and *UPL7* genes were used as internal qPCR controls. Data represent the mean value  $\pm$  s. e.

**Table S1.** Primers used for genotyping, semiquantitative RT-PCR and RT-qPCR

| Genotyping                                                                | Sequence (5'-3')                                                                         | Reference                |
|---------------------------------------------------------------------------|------------------------------------------------------------------------------------------|--------------------------|
| <b>co-1</b><br><i>CO-F</i><br><i>CO-GT1</i>                               | CCATTGTCGTTGTAGTGAGT<br>CTGCAAACCCACTTGCTAGA                                             | (Han et al., 2008)       |
| <b>fd-3</b><br><i>Salk_LBb1</i><br><i>FD-F</i><br><i>FD-R</i>             | GCGTGGACCGCTTGCTGCAACT<br>AGCCAGCGCCGGAATTCAAG<br>CTCTCTGCGTGTAGGATACTAC                 |                          |
| <b>phyB</b><br><i>Salk_LBb1</i><br><i>PHYB-F</i><br><i>PHYB-R</i>         | GCGTGGACCGCTTGCTGCAACT<br>GCAATGGGAAGTTTGTTCAGG<br>TGACTIONACAATCGCGTTTATGAC             |                          |
| <b>pif4</b><br><i>Sail_LB3</i><br><i>PIF4-F</i><br><i>PIF4-R</i> (EMO207) | TAGCATCTGAATTTTCATAACCAATCTCGATA<br>CAC<br>ACCAACGATCAGGATCAAACC<br>TCCAAACGAGAACCGTCGGT | (Leivar et al., 2008)    |
| <b>soc1</b><br><i>Salk_LBb1</i><br>S-138131-F<br>S-138131-R               | GCGTGGACCGCTTGCTGCAACT<br>TACACAAACCCTTTATCCTCG<br>AGCACTGAGAGGTCAAAGGC                  |                          |
| <b>xal1-2</b><br>GK T-DNA<br>NASC12-LP<br>NASC12-RP                       | CCCATTGACGCGTGAATGTAGACAC<br>ACCCAAACGTCAAATCATCAG<br>CTTCATTCCGAAACACAATGC              | Tapia-López et al., 2008 |
|                                                                           |                                                                                          |                          |
| <b>RT-PCR</b>                                                             |                                                                                          |                          |
| <b>XAL1</b><br>XAL1-F<br>XAL1-R                                           | ATGGCTCGTGGAAGATTCAGC<br>GAACTGAAATATTTCACTTGGCA                                         |                          |
| <b>FD</b><br>FD-F<br>FD-R                                                 | CTCTCTGCGTGTAGGATACTAC<br>AGCCAGCGCCGGAATTCAAGC                                          |                          |
| <b>SOC1</b><br>SOC-F<br>SOC-R                                             | TGAGGCATACTAAGGATCGAGTCAG<br>GCGTCTCTACTTCAGAACTTGGGC                                    |                          |
| <b>LFY</b><br>LFY-F<br>LFY-R                                              | AGCATCCGTTTATCGTAACGG<br>ACGATCCGGTACAGCTAATAC                                           |                          |
| <b>API</b><br>API-F<br>API-R                                              | GCACCTGAGTCCGACGTC<br>CGGCGAAGCAGCCAAGG                                                  |                          |
| <b>SPL3</b>                                                               |                                                                                          |                          |

|                                 |                                                         |                           |
|---------------------------------|---------------------------------------------------------|---------------------------|
| SPL3-F<br>SPL3-R                | TCATGTTTCGGATCTCTGGTC<br>ACCATGTCGTAGGTTTAGCAG          |                           |
| <b>SPL9</b><br>SPL9-F<br>SPL9-R | GATCTACTTCGAGGACGGTG<br>CACCATTTTCGTAAAGCGAAG           |                           |
| <b>TUB2</b><br>Tub-F<br>Tub-R   | AGGACTCTCAAACCTCACTACC<br>TCACCTTCTTCATCCGCAGTT         |                           |
|                                 |                                                         |                           |
| <b>qPCR</b>                     |                                                         |                           |
| AGL24-F<br>AGL24-R              | GAGGCTTTGGAGACAGAGTCGGTGA<br>AGATGGAAGCCCAAGCTTCAGGGAA  | (Liu et al., 2008)        |
| API-F<br>API-R                  | CATGGGTGGTCTGTATCAAGAAGAT<br>CATGCGGCGAAGCAGCCAAGGTT    | (Liu et al., 2008)        |
| FD-F<br>FD-R                    | CTCAAGAGACAACAAGATCAG<br>CACTTCTTCATGAGACAATCTC         |                           |
| FT-F<br>FT-R                    | GGTGGAGAAGACCTCAGGAA<br>ATATTCTCGGAGGTGAGGGT            |                           |
| FUL-F<br>FUL-R                  | GTTCTTCTGCCTCAATACTG<br>GAGATAGTTCTACTCGTTCGT           |                           |
| LFY-F<br>LFY-R                  | ATCGCTTGTCGTCATGGCTG<br>GCAACCGCATTGTTCCGCTC            | (Han et al., 2008)        |
| PDF2-F<br>PDF2-R                | TAACGTGGCCAAAATGATGC<br>GTTCTCCACAACCGCTTGGT            | (Czechowski et al., 2005) |
| PHYB-F<br>PHYB-R                | ATGCACCATCTCAAGAGTGG<br>GCCATTCTGAATTCTGTGCG            |                           |
| RNAH-F<br>RNAH-R                | CCATTCTACTTTTTGGGCGGCT<br>TCAATGGTAACTGATCCACTCTGATG    | (Czechowski et al., 2005) |
| SOC1-F<br>SOC1-R                | AGCTGCAGAAAACGAGAAGCTCTCG<br>GGGCTACTCTCTTCATCACCTCTTCC | (Liu et al., 2008)        |
| SPL3-F<br>SPL3-R                | TCATGTTTCGGATCTCTGGTC<br>TTCCGCCTTCTCTCGTTGTG           |                           |
| SPL4-F<br>SPL4-R                | CAGTAGGTTTCATGACCTCC<br>CCATAAGTACTCTCACCAGAG           |                           |
| SPL5-F<br>SPL5-R                | GCCAAGCAGTATTACCGCAG<br>TCTGGTAGCTCATGAAACCTG           |                           |
| SPL9-F<br>SPL9-R                | GGAATTTGACCTAGAGAAAAG<br>CACCATTTTCGTAAAGCGAAG          |                           |
| SPL15-F<br>SPL15-R              | CAGCCACCGCCCATTTCAAC<br>GGAAATCTGCTGGCTCCGAGA           | (Wei et al., 2012)        |
| TSF-F<br>TSF-R                  | ATGCCTTTGGCAATGAGGTG<br>ACCGTTTGTCTTCCGAGTTG            |                           |
| UPL7-F<br>UPL7-R                | TTCAAATACTTGACGCCAACCTT<br>CCCAAAGAGAGGTATCACAAGAGACT   | (Czechowski et al., 2005) |
| XAL1-F<br>XAL1-R                | CGAAAAGATAGAGGAAAACAAC<br>GGCATTGTTAGCGGATAGGA          |                           |

- Czechowski, T., Stitt, M., Altmann, T., Udvardi, M. K., and Scheible, W. R. (2005). Genome-wide identification and testing of superior reference genes for transcript normalization in arabidopsis. *Plant Physiology* 139, 5-17. doi:10.1104/pp.105.063743.
- Han, P., García-Ponce, B., Fonseca-Salazar, G., Alvarez-Buylla, E. R., and Yu, H. (2008). AGAMOUS-LIKE 17, a novel flowering promoter, acts in a FT-independent photoperiod pathway. *The Plant J* 55, 253-265. doi:10.1111/j.1365-313X.2008.03499.x.
- Leivar P., Monte E., Al-Sady B., Carle C., Storer A., Alonso J. M., Ecker J.R., and Quail P.H. (2008). The Arabidopsis Phytochrome-Interacting Factor PIF7, Together with PIF3 and PIF4, Regulates Responses to Prolonged Red Light by Modulating phyB Levels. *The Plant Cell*, 20: 337-352. doi/10.1105/tpc.107.052142
- Liu, C., Chen, H., Er, H. L., Soo, H. M., Kumar, P. P., Han, J.-H., et al. (2008). Direct interaction of AGL24 and SOC1 integrates flowering signals in Arabidopsis. *Development* 135, 1481-1491. doi:10.1242/dev.020255.
- Tapia-López R., García-Ponce B., Dubrovsky J.G., Garay-Arroyo A., Pérez-Ruiz R.V., Kim S.H., Acevedo F., Pelaz S. and Alvarez-Buylla E.R. (2008). An AGAMOUS-related MADS-box gene, *XAL1* (*AGL12*), regulates root meristem cell proliferation and flowering transition in *Arabidopsis thaliana*. *Plant Physiol.* 146(3): 1182-1192. doi: 10.1104/pp.107.108647.
- Wei, S., Gruber, M. Y., Yu, B., Gao, M. J., Khachatourians, G. G., Hegedus, D. D., et al. (2012). Arabidopsis mutant sk156 reveals complex regulation of SPL15 in a miR156-controlled gene network. *BMC Plant Biol* 12, 169. doi:10.1186/1471-2229-12-169.

**Table S2.** Primers used in ChIP assays

| Gene               | Sequence                                              |
|--------------------|-------------------------------------------------------|
| <b><i>FD</i></b>   |                                                       |
| Fragment 1         | F CCAAGGCCCTCTCTACTTGA<br>R GATTGTGACATTGAACCTATTCT   |
| Fragment 2         | F CCATCTTGACTATCCAACGGT<br>R TCCGTAGGTTGTCTCTAGAC     |
| Fragment 3         | F ACCCAATGTTTGGAAACATGTAA<br>R TTATCGAAAATGCAAGCTCCTC |
| Fragment 4         | F CATATAATAGTTTATGGAATTTCTC<br>R ATGATGGGGTTGGGTCCAAG |
|                    |                                                       |
| <b><i>SOC1</i></b> |                                                       |
| Fragment 1         | F CTCCCGATATAGATAAAAGATC<br>R AGTAGCGACGTGTCTAAAGAG   |
| Fragment 2         | F TGAATTTTATCTGTTGGGATGG<br>R ACACTCTCTCGTACCTATATG   |
| Fragment 3         | F GTGTTTGTGTCCACATTAAAAAC<br>R GCTTGAAACCTCATCCTTTAC  |
| Fragment 4         | F CATTACCATAACTACAACGAGA<br>R TTGATTCTCTGCGAAAGGAAG   |
|                    |                                                       |
| <b><i>LFY</i></b>  |                                                       |
| Fragment 1         | F ATCCATTTTTCGCAAAGGAAAG<br>R GGTCACAAGAACGGAATCAC    |
| Fragment 2         | F TCTTCCCCTAACAATACTTCC<br>R TTAAGTGTATTGGCATGGACG    |
| Fragment 3         | F CCCAGCAAGACACATATCTTC<br>R CTTTCTTTACTCTTTTGAGCAG   |
|                    |                                                       |
| <b><i>API</i></b>  |                                                       |
| Fragment 1         | F TTGTTTTCTCTAAGGCTTATGC<br>R GCTCAATTGCTTAATCACTTC   |
| Fragment 2         | F CAACATAGCACATATTCAACTG<br>R ACTGTGTAATGTATTGCGTCG   |
| Fragment 3         | F TAAAGATCCCGAGACTCAAAC<br>R TACCCCTTCCCATTTTGTATC    |
| Fragment 4         | F GCCCTAATTATCACTACTGC<br>R TTCTAGGGTTCACTTCACTAC     |
